# Supplementary material for: Developing the Inner Scientist: Book Club Participation and The Nature of Science
Source: Atypon-hosted journal article supplement (doi:10.1187/cbe.12-02-0020), 2013-03-01
Supplement: combinedsupmats2.pdf [file combinedsupmats2.pdf]

Appendix B  
BIOG 102 Book Club  
Journal entry template

Name:

Date:

Book:

Assigned Reading:

List all vocabulary words or cultural references in the reading that you didn't know.

Identify at least three concepts in the assigned reading that you already knew about.

- 1.
- 2.
- 3.

Identify at least three new insights you had while reading this section.

- 1.
- 2.
- 3.

Identify at least three passages or ideas that are still confusing to you or new questions that emerged as a result of this reading.

- 1.
- 2.
- 3.

For each chapter in the reading, state in three sentences or less what each chapter is about.
